# Supplementary material
Source: PubMed Central journal article supplement (PMC6633608)
Supplement: develop-146-174615-s1.pdf [file develop-146-174615-s1.pdf]

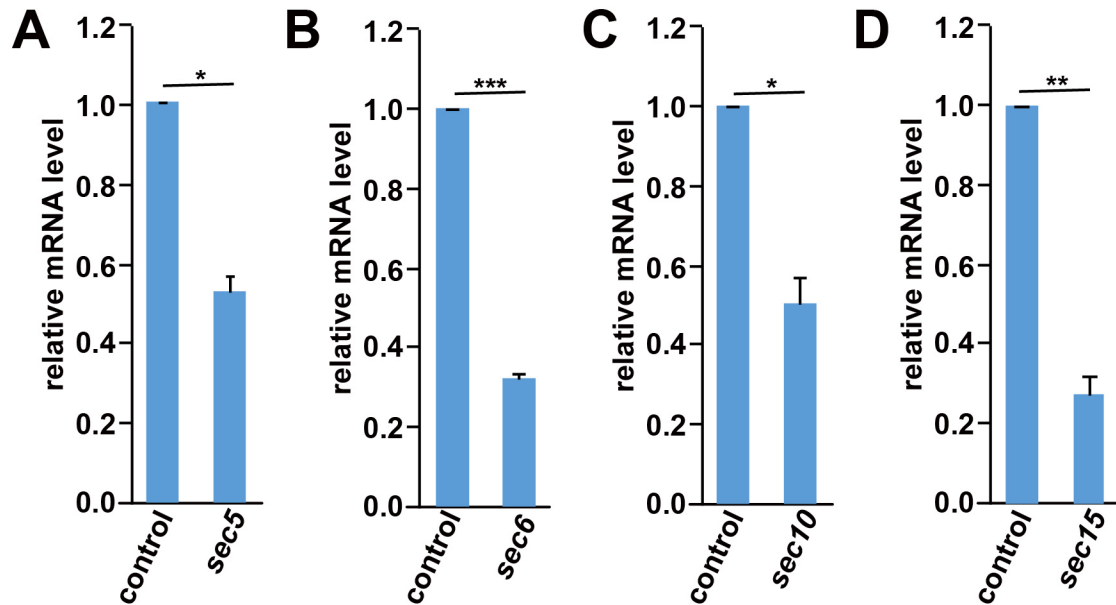

Figure S1. The expression of *sec5/6/10/15* genes can be efficiently knocked down in the ovary by corresponding RNAi lines. (A-D) Quantitative RT-PCR results show that *actin5C-gal4*-mediated expression of the *UAS-RNAi* lines against *sec5*, *sec6*, *sec10* and *sec15* can significantly knock down their corresponding RNA targets in the isolated germaria (three replicates).

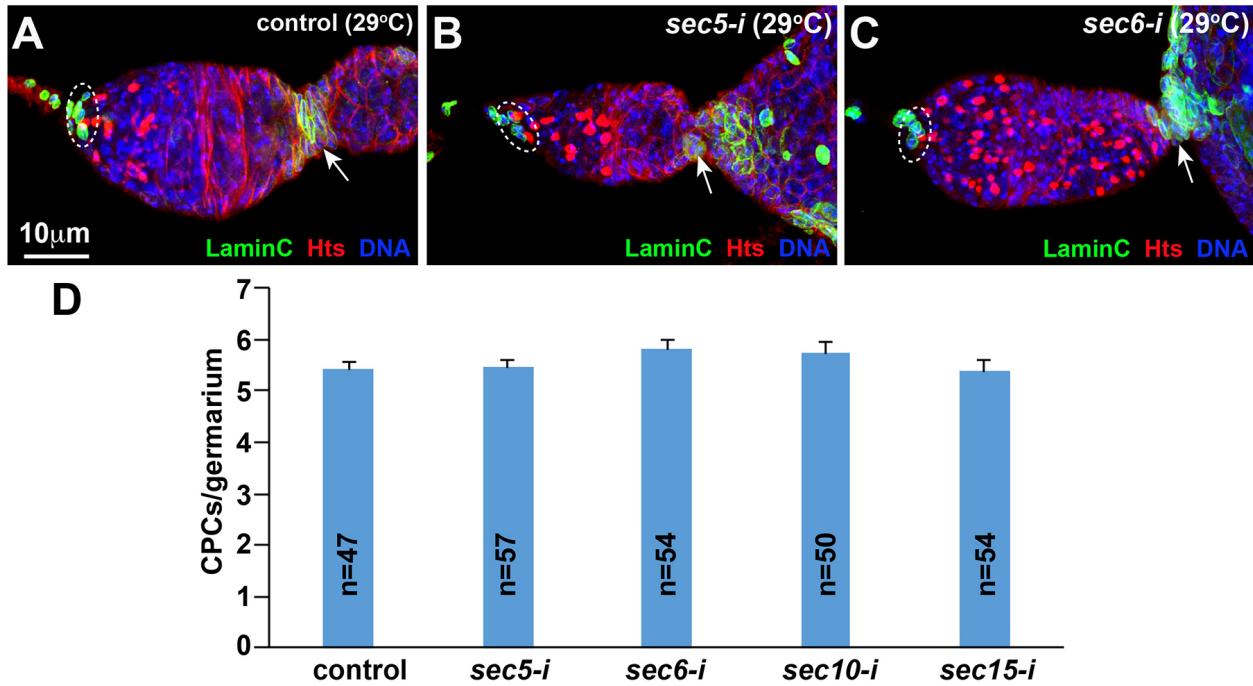

Figure S2. *sec5/6/10/15* knockdown does not convert ISC into cap cells. Broken ovals highlight Lamin C-positive cap cells and spectrosome-containing GSCs, whereas arrows indicate Lamin C-positive stalk cells. (A-C) *c587-gal4*-mediated *sec5/6-i* do not change cap cell numbers or convert ISCs to cap cells based on Lamin C expression compared to control (A). (D) Qualification results show that *sec5/6/10/15* knockdown in ISCs do not change cap cell numbers in comparison to the control.

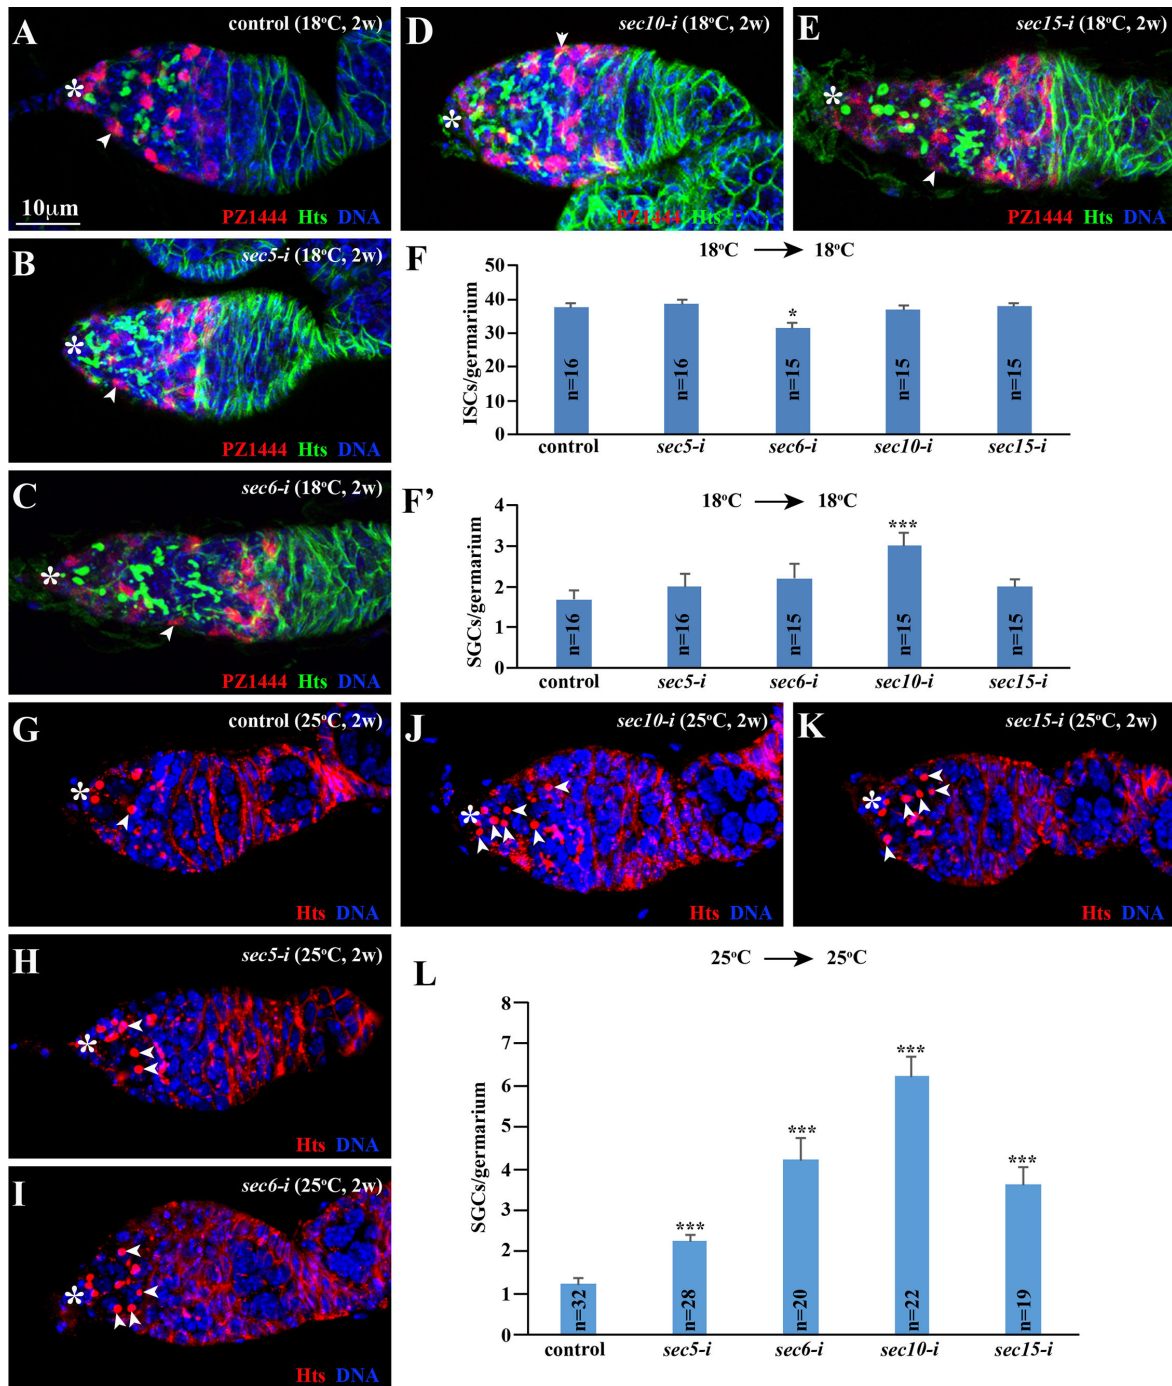

Figure S3. *c587*-driven RNAi knockdown of *sec* genes at 18°C show no effect on the numbers of ISCs, GSCs and CBs. (A-F') *sec5/6/10/15-i* germaria have the normal numbers of ISCs and SGCs in comparison to the control at 18°C. F and F': SGC and ISC quantification results, respectively. Asterisks highlight the cap cell area, whereas arrowheads indicate ISCs. (G-L) *sec5/6/10/15-i* germaria exhibit a significant increase in the SGC number compared to the control when those *c587;tub-gal80<sup>ts</sup>*-mediated knockdown females are cultured at 25°C. L: SGC quantification results. Asterisks highlight the cap cell area, whereas arrowheads indicate SGCs.

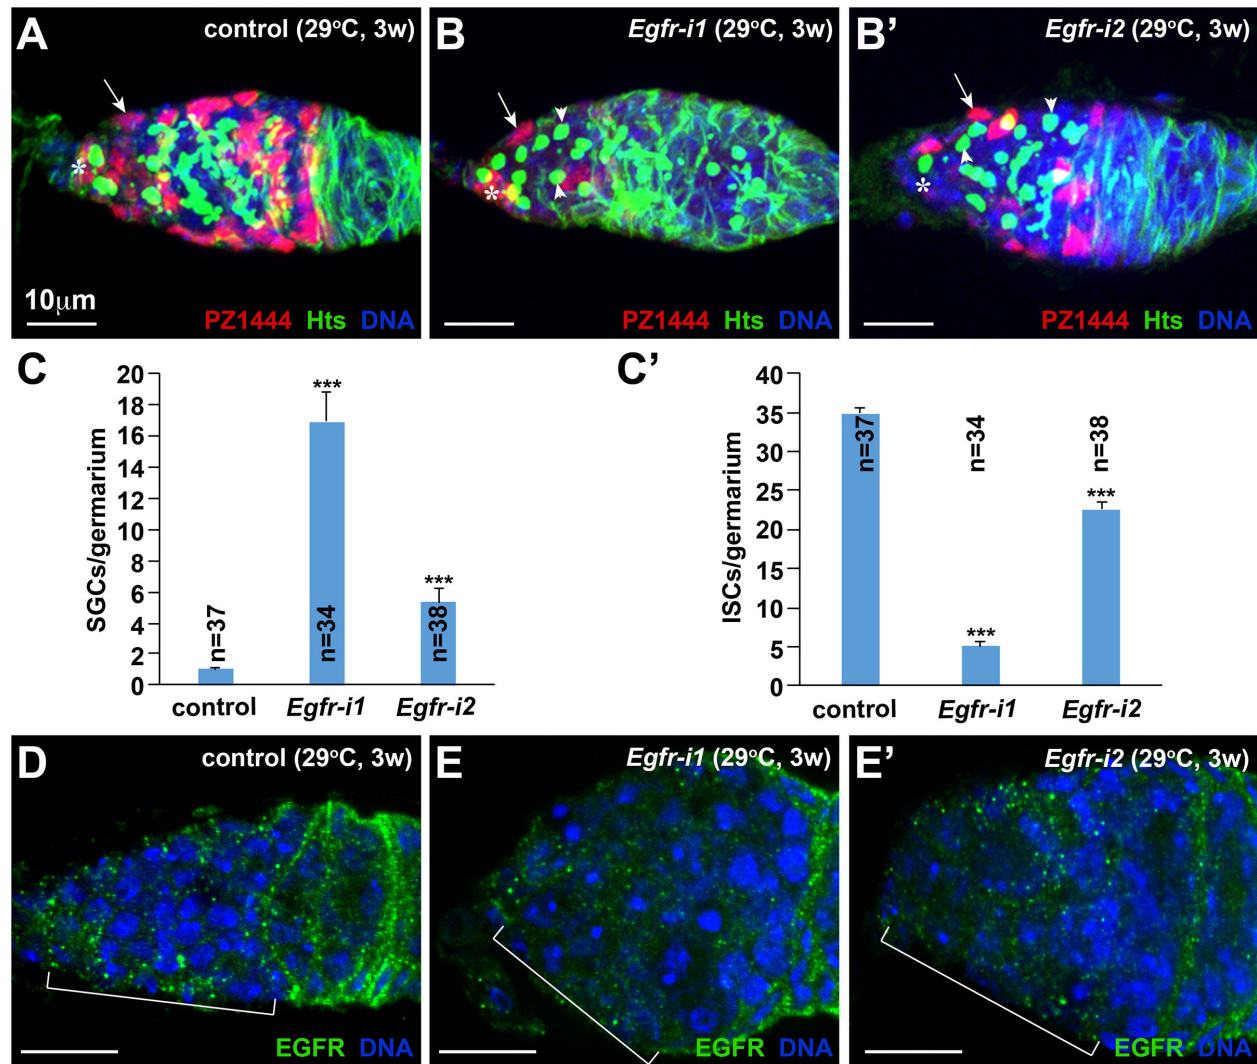

Figure S4. The exocyst complex is required for maintaining ISCs and promoting GSC progeny differentiation. (A-C') *Egfr-i* germaria (B, B') contain significantly more SGCs and significantly fewer ISCs than the control germarium (A) three weeks after temperature shift to 29°C in the adult stage. C and C': SGC and ISC quantification results. Arrows point to ISCs, whereas arrowheads denote spectrosomes. (D-E') EGFR-positive speckles are drastically decreased in the knockdown germaria by two independent RNAi lines (E, E') in comparison with the control germarium (D).

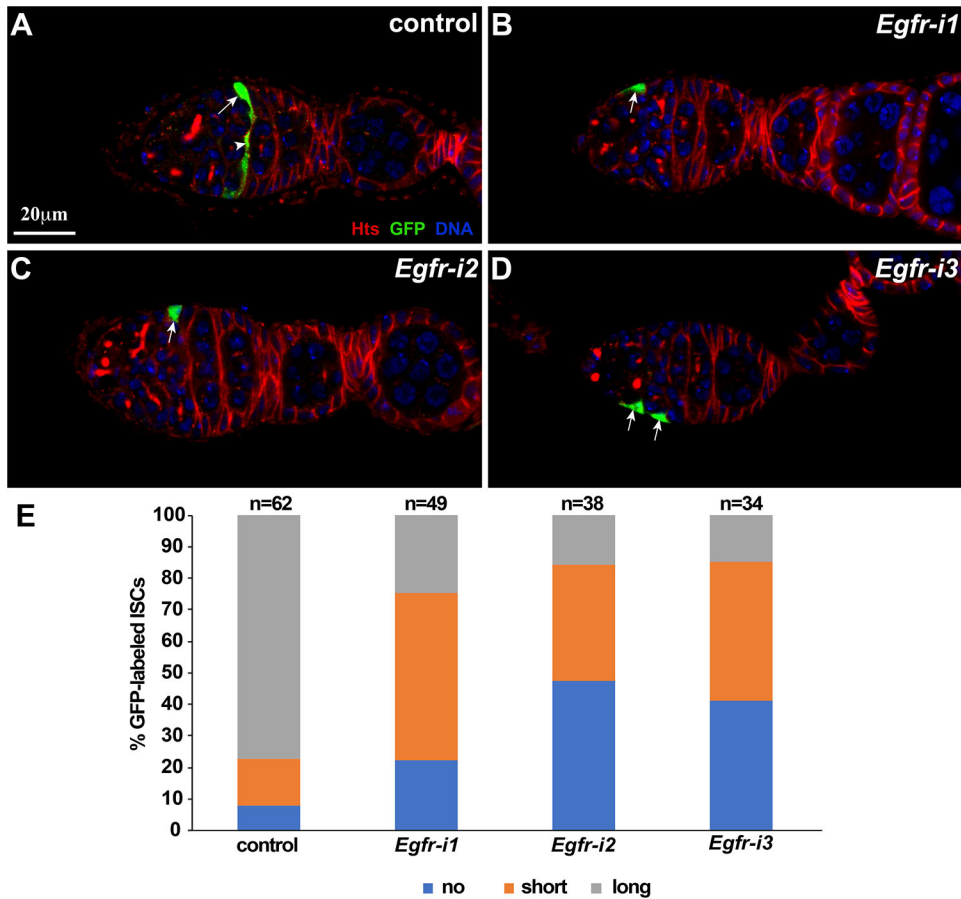

Figure S5. EGFR is required intrinsically for maintaining ISC cellular processes. Arrows and arrowheads indicate ISCs and their cellular processes, respectively. (A-D) Individually GFP-marked *Egfr* knock down ISCs by three independent RNAi lines (B-D) frequently lose their cellular processes compared to the marked control ISCs (A). E: quantification results on ISC cellular processes based on their length.

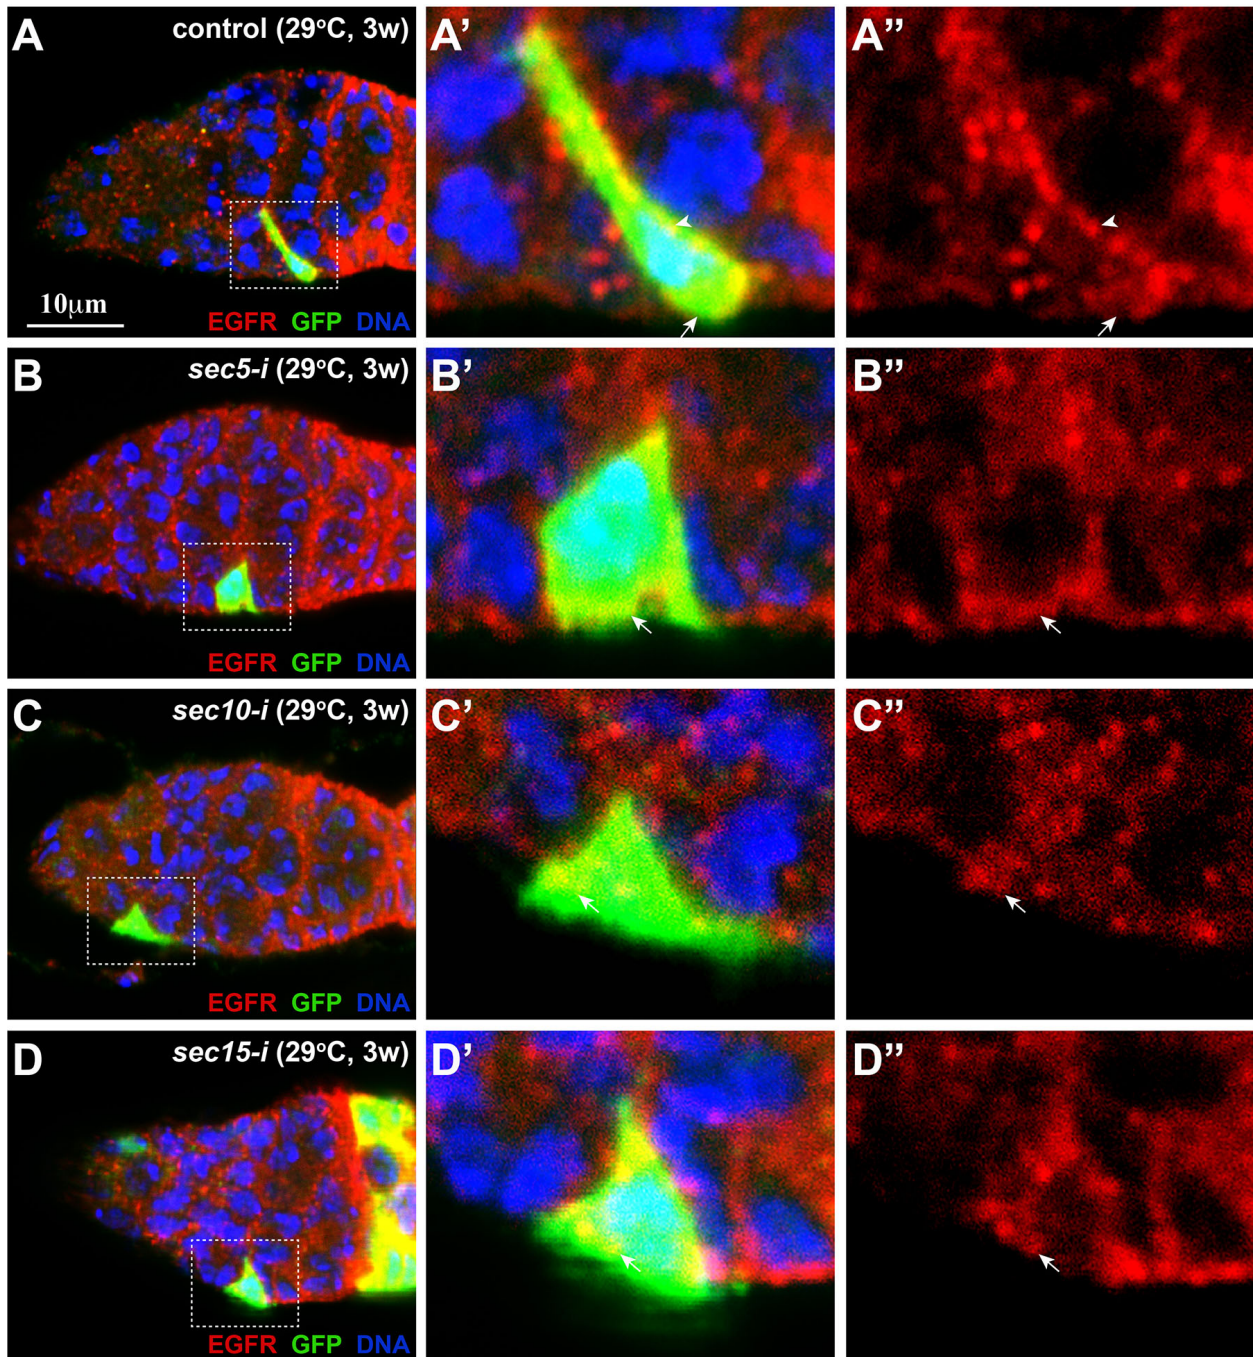

Figure S6. The exocyst is required for the apical trafficking of EGFR protein in ISCs. **A'-D'** and **A''-D''** are highlighted areas in **A-D** at a higher magnification. (**A-A''**) In the control GFP-labeled ISC, EGFR-positive speckles (arrowheads) move along the GFP-labeled ISC cellular process on the apical side, but very few EGFR-positive speckles are observed on the basal side (arrow). (**B-D''**) Individual GFP-marked *sec5-i* (**B-B''**), *sec10-i* (**C-C''**) and *sec15-i* (**D-D''**) ISCs lose their cellular processes, and retain EGFR-positive speckles (arrows, **B'-D'** and **B''-D''**) on both the apical and basal sides.

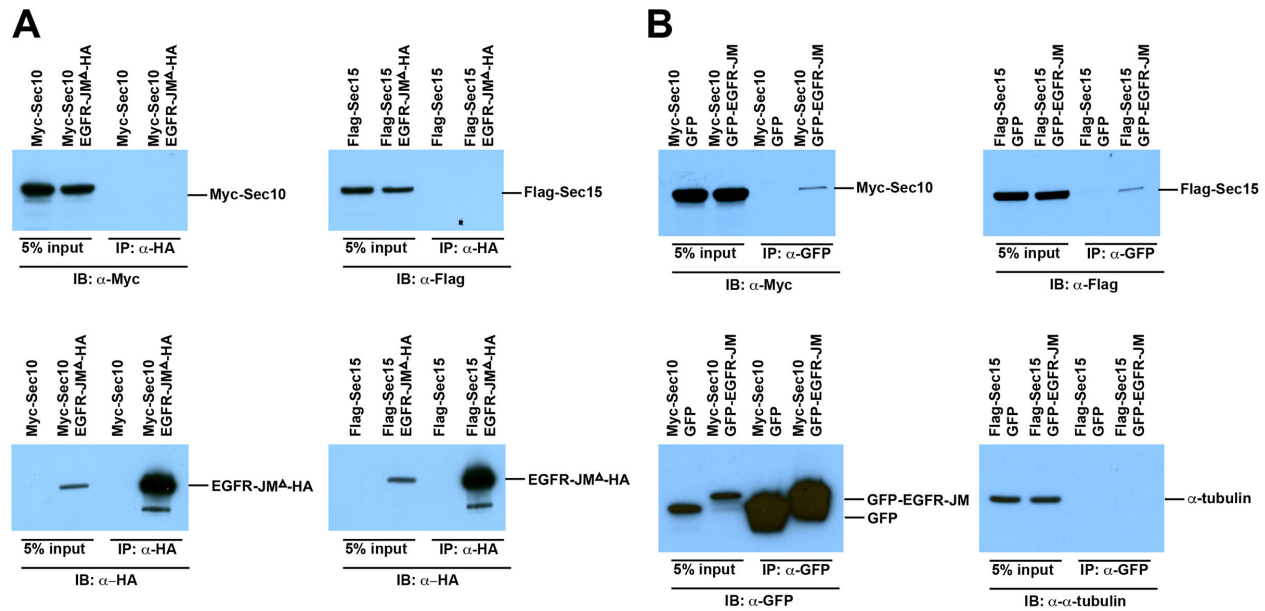

Figure S7. Sec10 and Sec15 are associated with EGFR primarily through binding to the previously defined juxtamembrane domain (JM). **(A)** CO-IP results show that Myc-Sec10 and Flag-Sec15 fail to be brought down by HA-tagged EGFR lacking the JM domain (EGFR-JM<sup>Δ</sup>-HA) in S2 cells. **(B)** CO-IP results show that Myc-Sec10 and Flag-Sec15 can specifically be pulled down by GFP-tagged the EGFR's JM domain (GFP-MT), but not GFP alone, in S2 cells.  $\alpha$ -tubulin is used as a negative control.

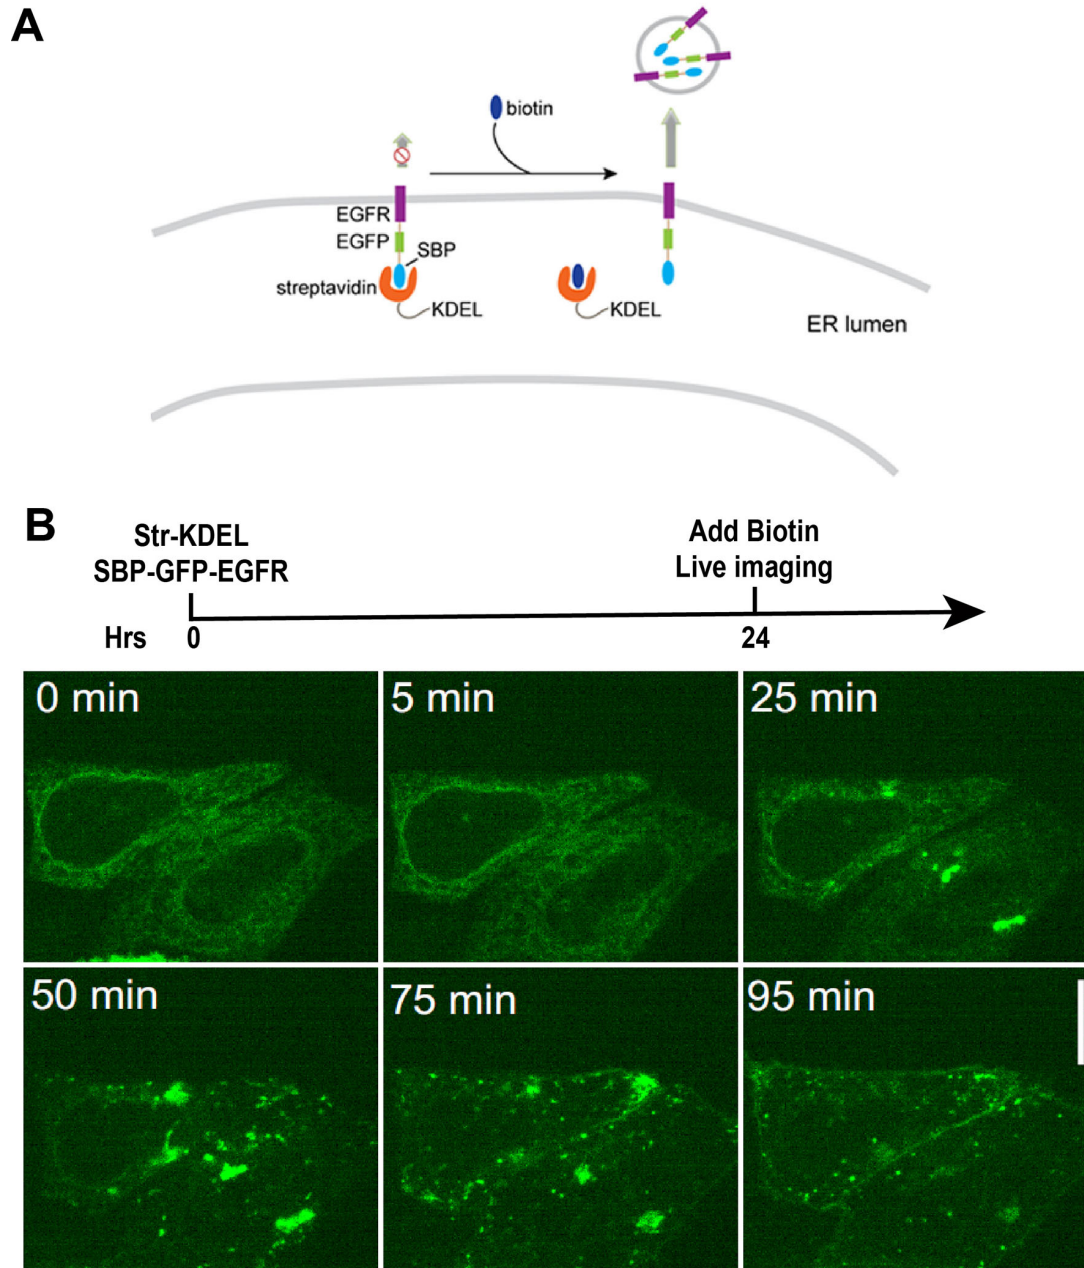

Figure S8. The RUSH transport assay in human cells. **(A)** A diagram explaining the RUSH assay: the binding of streptavidin to SBP causes SBP-GFP-EGFR to be retained at the ER; biotin addition releases streptavidin from SBP-GFP-EGFR to allow SBP-GFP-EGFR for trafficking to the plasma membrane. **(B)** A time-lapse series of confocal images of SBP-GFP-EGFR in Str-KDEL- and SBP-GFP-EGFR-expressing HeLa cells following biotin addition. Confocal images were taken at an interval of 30 seconds following biotin treatment. Representative images at selected time points are shown. Scale bar: 10 $\mu$ m.



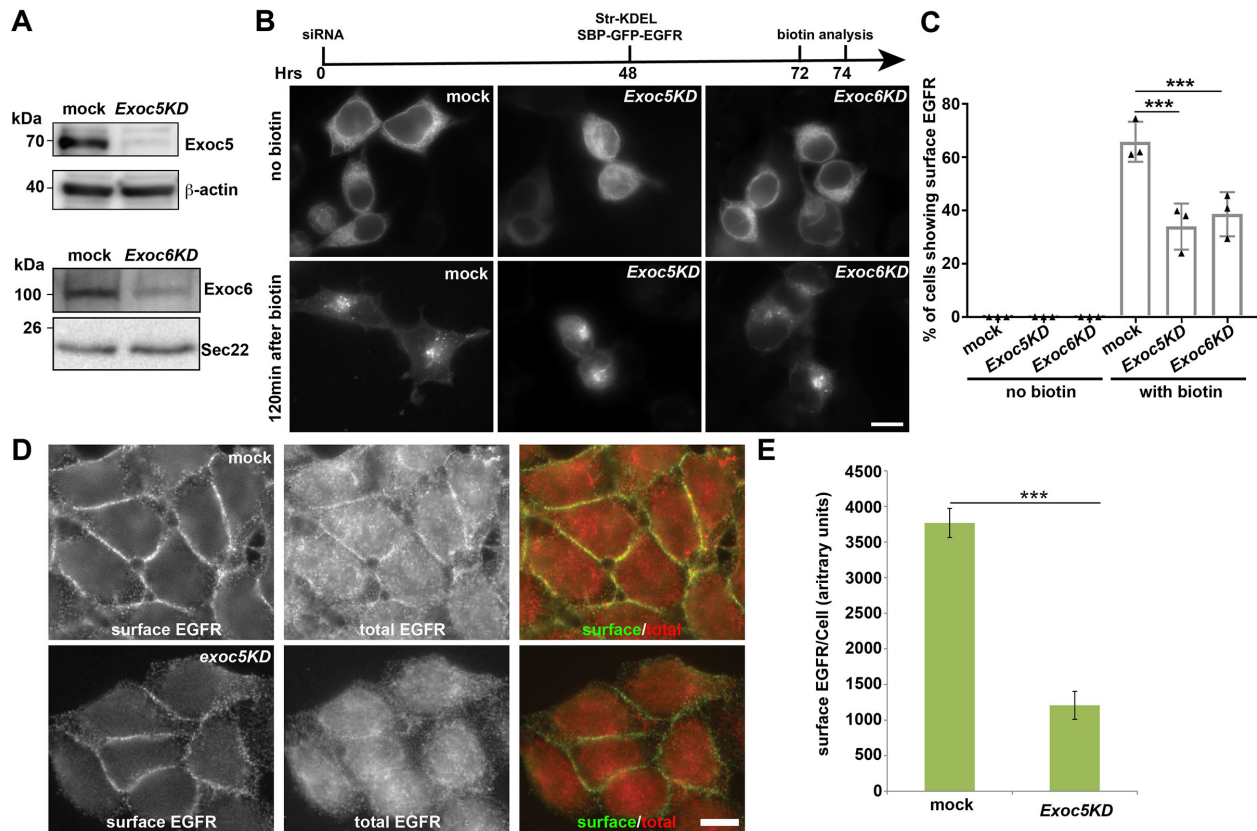

Figure S9. Exoc5 and Exoc6 regulate the surface delivery of newly synthesized EGFR in HEK293T cells. (A) Western blots show that siRNAs against *Exoc5* (*Exoc5KD*) and *Exoc6* (*Exoc6KD*) can efficiently knock down the expression of Exoc5 and Exoc6 in HEK293T cells, respectively, compared to the mock transfection. (B) *Exoc5KD* and *Exoc6KD* HEK293T cells frequently accumulate SBP-GFP-EGFR in the perinuclear puncta while mock-transfected cells efficiently transported SBP-GFP-EGFR to the plasma membrane. Scale bar: 10 $\mu$ m. (C) Quantification results on the percentage of cells showing detectable surface-localized EGFR-GFP in the cells treated with control siRNA, siRNA against *Exoc5* and *Exoc6* (mean  $\pm$  S.D.; n = 3; >100 cells counted for each experiment). (D) *Exoc5KD* HeLa cells show a lower ratio of surface EGFR versus total EGFR than the mock-transfected cells. Scale bar: 10 $\mu$ m. (E) Quantification of the average fluorescent levels of the surface EGFR/cell (mean  $\pm$  SEM; based on seven random fields of images in each experimental group; >15 cells in each field).

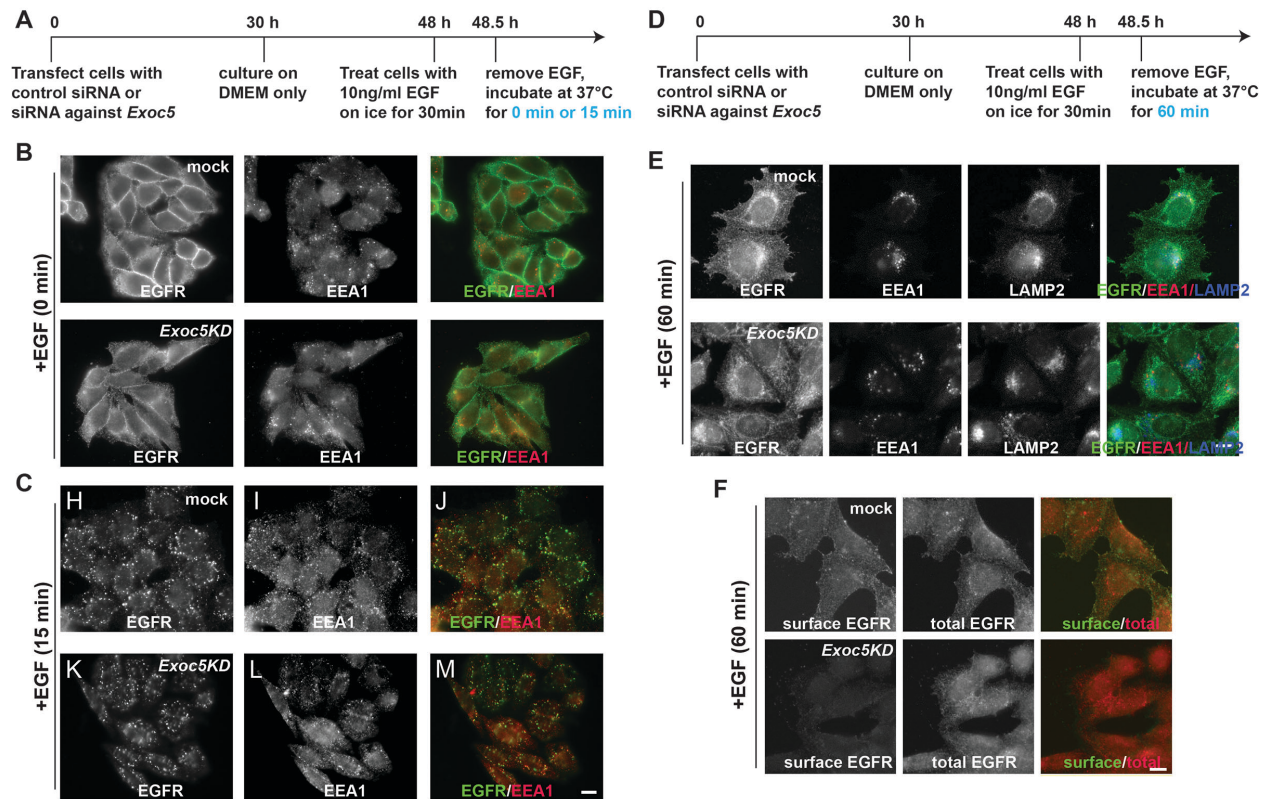

Figure S10. *Exoc5* is required for the retrieval of internalized EGFR to the plasma membrane, but not for the EGF-induced EGFR endocytosis. (A-C) Using the experimental procedures (A), *Exoc5* knockdown HeLa cells show lower EGFR on the membrane than control cells after incubation with EGF on ice for 30 min (preventing endocytosis) (B). After incubation with EGF on ice for 30min followed by incubation at 37 °C for 15min (initiating EGF activation), EGFR can be endocytosed in both the knockdown and control cells based on EGFR and EEA1 co-localization (C). (D-F) Using the experimental procedures (D), *Exoc5* knockdown HeLa cells exhibit the obvious defect in the EGFR membrane recycling after EGF stimulation in comparison with the control (E). Consistently, *Exoc5* knockdown HeLa cells show much less membrane EGFR than the control cells in the presence of the lysosomal enzyme inhibitor, bafilomycin-A1, after EGF stimulation based on surface and total EGFR staining (F). Scale bars: 10 $\mu$ m.

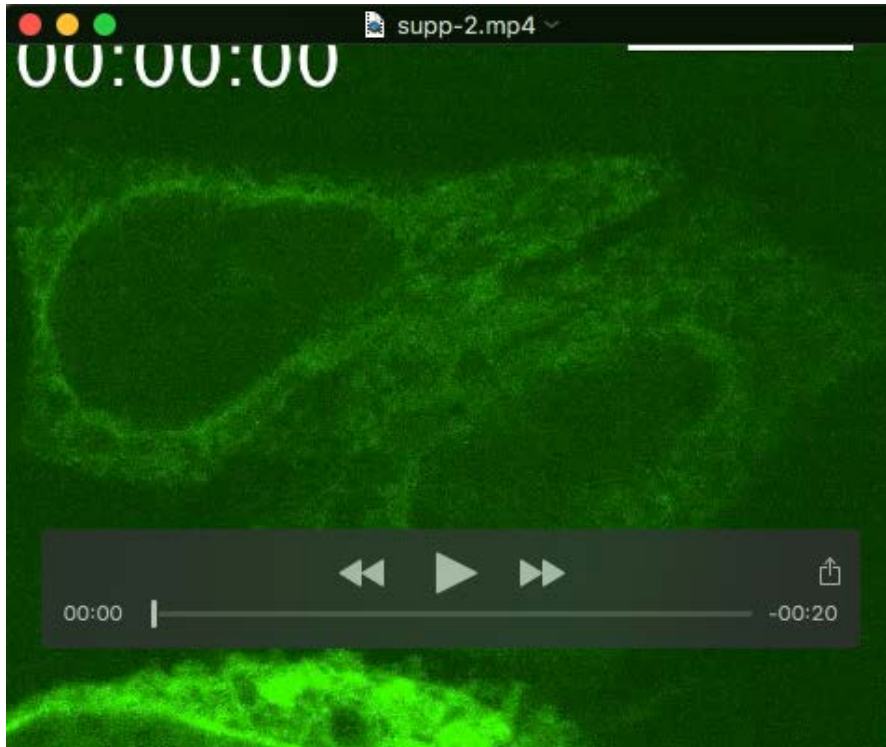

**Movie 1.** A time-lapse video of the RUSH assay for EGFR-GFP in HeLa cells after biotin treatment. Representative frames are shown in Figure S8B.
